# Supplementary material for: FTD/ALS-associated poly(GR) protein impairs the Notch pathway and is recruited by poly(GA) into cytoplasmic inclusions
Source: Springer Nature journal article supplement (doi:10.1007/s00401-015-1448-6), 2015-06-01

a Flag-(GA)<sub>80</sub> (Green)

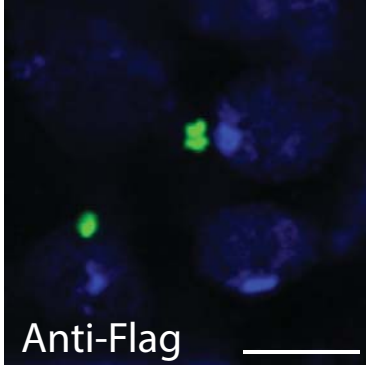

b Flag-(GR)<sub>80</sub> (Green)

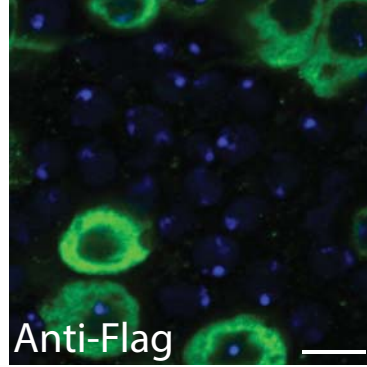

c Flag-(PR)<sub>80</sub> (Green)

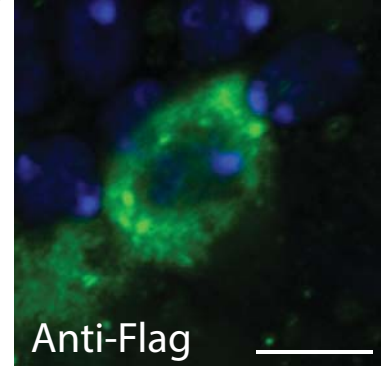

d Flag-(GR)<sub>80</sub> (Red)

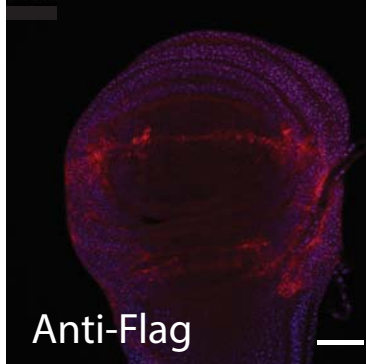

e Flag-(GR)<sub>80</sub> (Red)

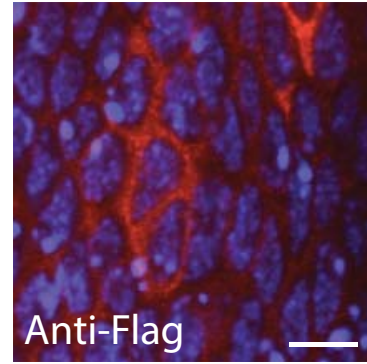

f Flag-(PR)<sub>80</sub> (Red)

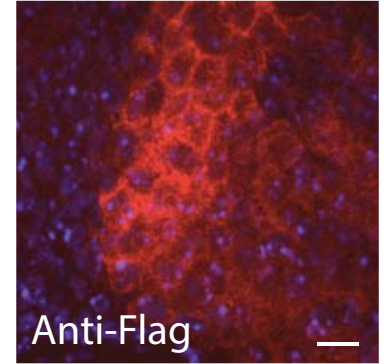

g Flag-(GR)<sub>80</sub> (Red)

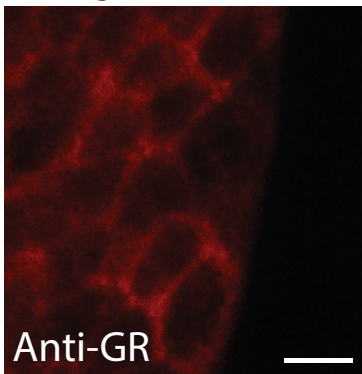

h No (GR)<sub>80</sub> Expression

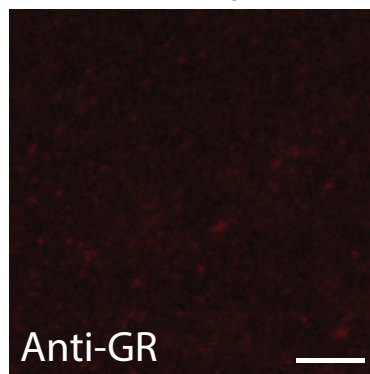

Supplement: MOESM3 [file 8404906]
