# Supplementary material for: FTD/ALS-associated poly(GR) protein impairs the Notch pathway and is recruited by poly(GA) into cytoplasmic inclusions
Source: Springer Nature journal article supplement (doi:10.1007/s00401-015-1448-6), 2015-06-01

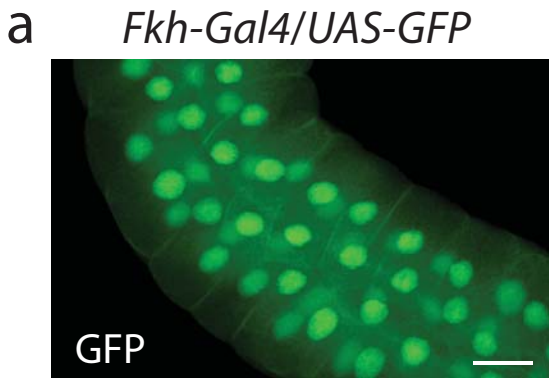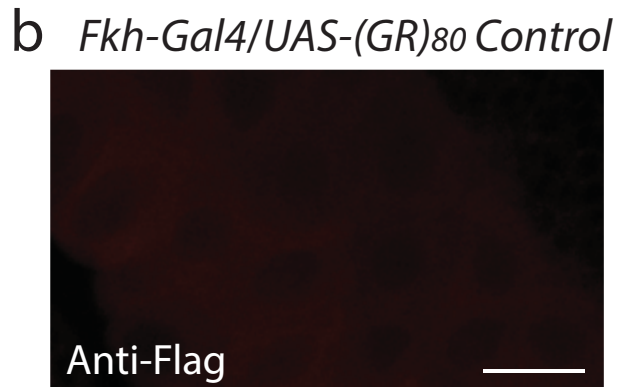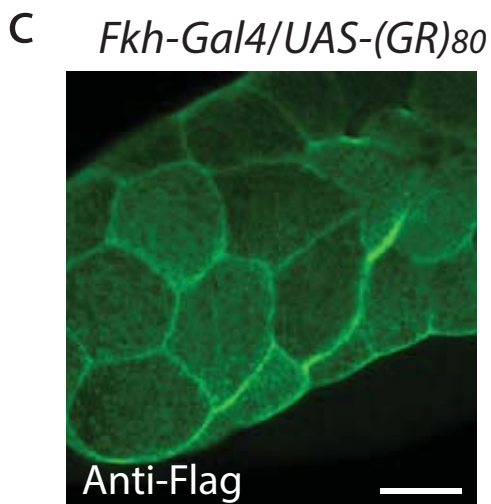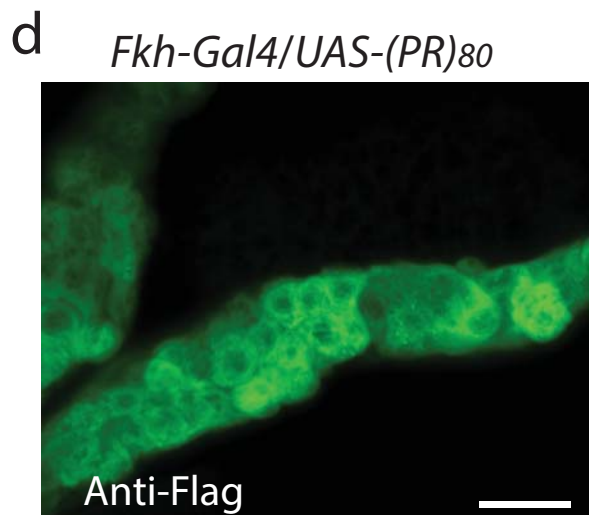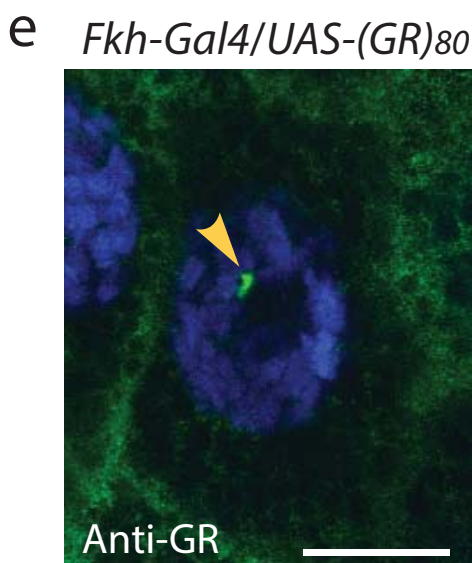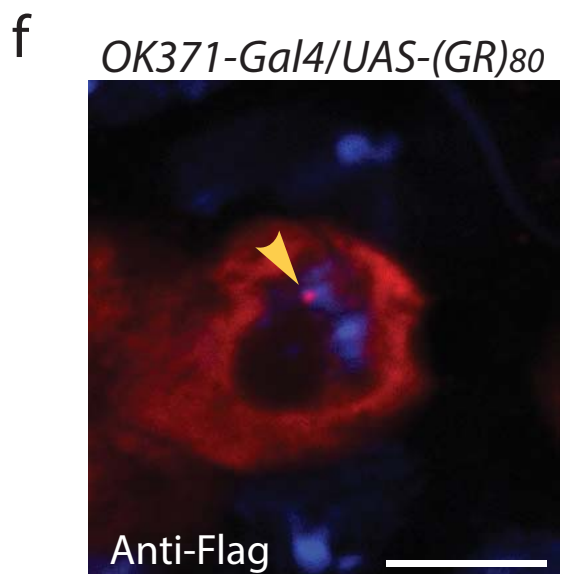

Supplement: MOESM4 [file 8404906]
